# Supplementary material for: Transcriptomic analysis of Rhizobium leguminosarum bacteroids in determinate and indeterminate nodules
Source: PubMed Central journal article supplement (PMC6421345; doi:10.1099/mgen.0.000254), 2019-02-19
Supplement: mgen-5-254-s001.pdf [file mgen-5-254-s001.pdf]

Fig. S1. Replicons of strains Rlp4292 and RlvA34. Shared and unique replicons are drawn in a Venn diagram (not to scale).

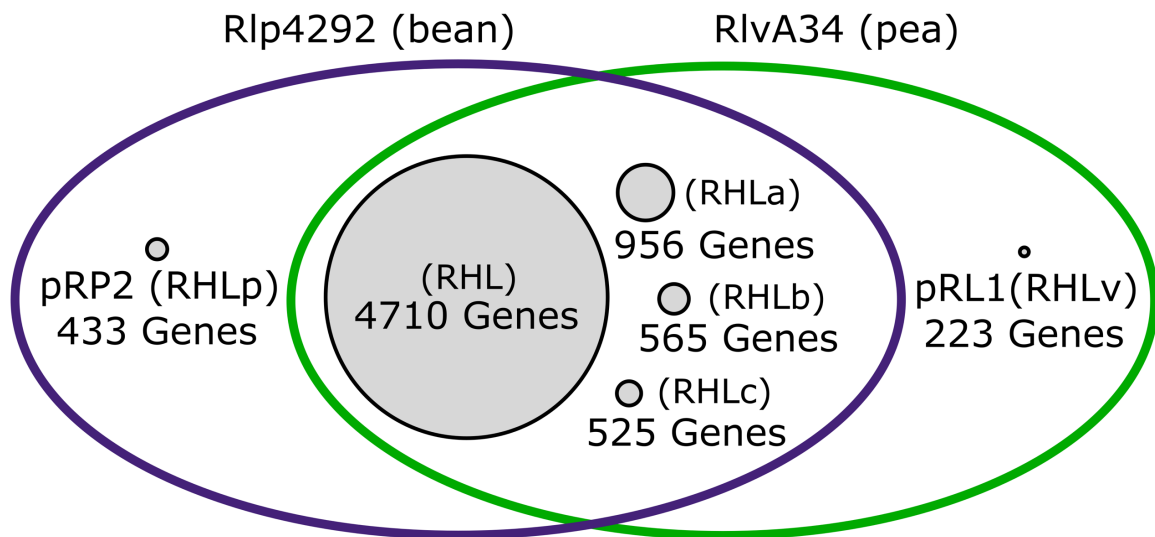

Fig. S2. Genes differentially expressed in bacteroids of Rlp4292 in bean nodules and RlvA34 in pea nodules. Pie charts show, by replicon, the proportion of genes up-regulated >2-fold in green, those not differentially expressed (<2-fold up- or down-regulated) in yellow and down-regulated >2-fold in red. The total number of genes on each replicon is shown. This figure is drawn from data in Table S4.

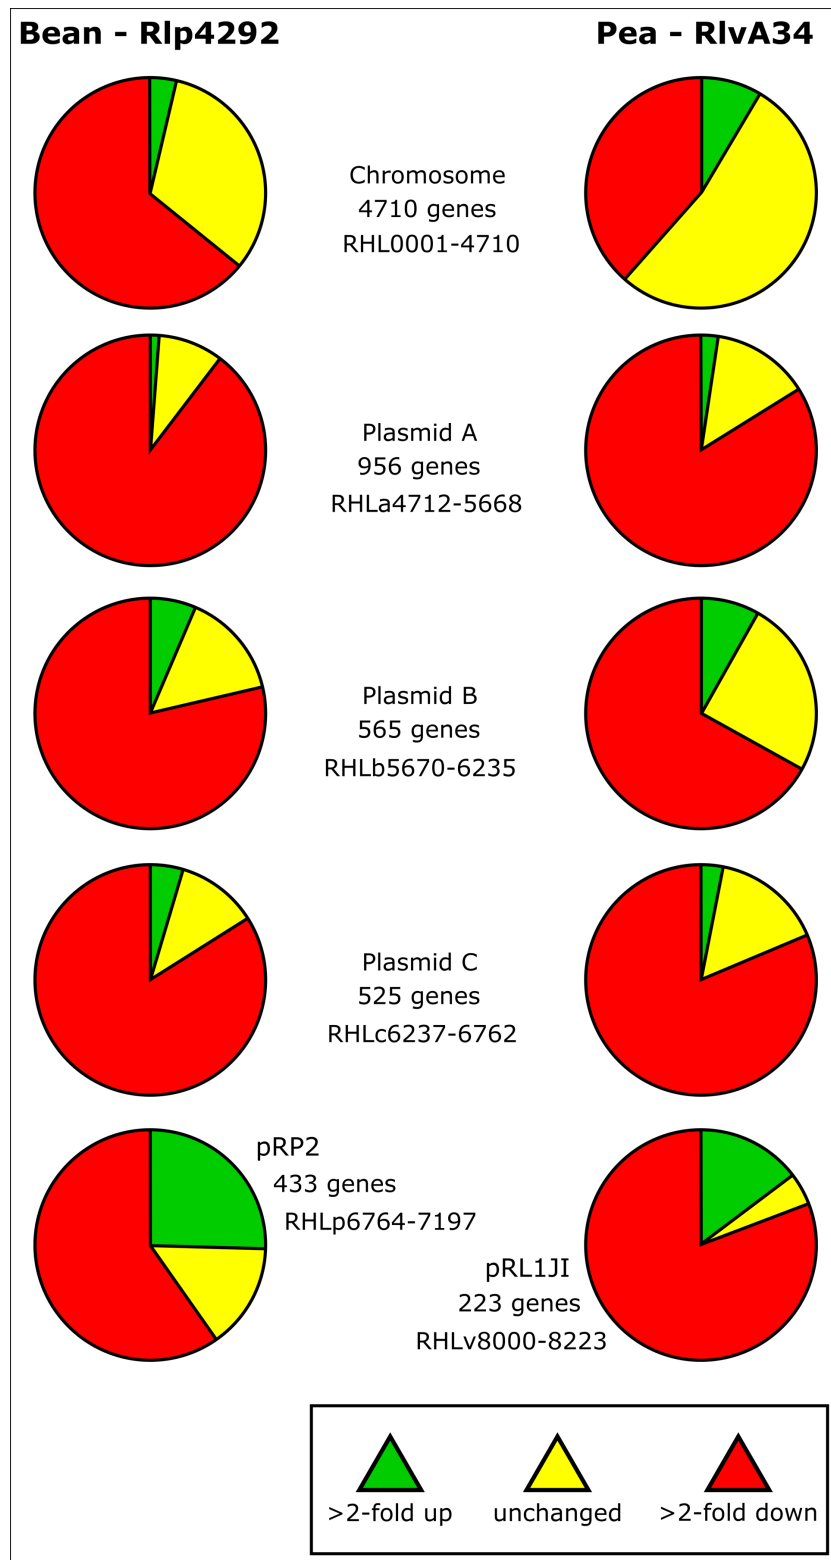

**Table S3.** Comparison of the multiple copies of Fix, Nif and Nod proteins encoded on the Sym plasmid pRP2 of Rlp4292 with those of Rlv3841.

|              |          |             | % Identity to Rlv3841 gene product: |           |           |           |           |           |
|--------------|----------|-------------|-------------------------------------|-----------|-----------|-----------|-----------|-----------|
| Gene product |          |             | FixN                                | NifB      | NifD      | NifH      | NodA      | NodD      |
| Gene         |          |             | pRL100205                           | pRL100195 | pRL100161 | pRL100162 | pRL100185 | pRL100184 |
|              |          | Amino acids | 540                                 | 497       | 501       | 297       | 310       | 540       |
| FixN         | RHLp7186 | 540         | 93                                  |           |           |           |           |           |
| ψFixN        | RHLp7176 | 67          | 29                                  |           |           |           |           |           |
| NifB1        | RHLp7097 | 492         |                                     | 69        |           |           |           |           |
| ψNifB1       | RHLp7023 | 291         |                                     | 60        |           |           |           |           |
| ψNifB2       | RHLp7057 | 165         |                                     | 44        |           |           |           |           |
| NifD         | RHLp7061 | 500         |                                     |           | 84        |           |           |           |
| ψNifD        | RHLp7132 | 70          |                                     |           | 68        |           |           |           |
| NifH1        | RHLp7062 | 297         |                                     |           |           | 84        |           |           |
| NifH2        | RHLp7131 | 297         |                                     |           |           | 89        |           |           |
| ψNifH        | RHLp7071 | 192         |                                     |           |           | 93        |           |           |
| NodA1        | RHLp7065 | 195         |                                     |           |           |           | 65        |           |
| NodA2        | RHLp7104 | 225         |                                     |           |           |           | 54        |           |
| NodD1        | RHLp7142 | 314         |                                     |           |           |           |           | 69        |
| NodD2        | RHLp7160 | 318         |                                     |           |           |           |           | 71        |
| NodD3        | RHLp7161 | 302         |                                     |           |           |           |           | 67        |

**Table S7.** Differential gene expression in bacteroids isolated from bean (Rlp4292) and pea (RlvA34) nodules

|                                    | Number of genes differentially expressed (>5-fold up- or down-regulated) in bacteroids per replicon |           |           |           |             |
|------------------------------------|-----------------------------------------------------------------------------------------------------|-----------|-----------|-----------|-------------|
|                                    | Chromosome                                                                                          | Plasmid A | Plasmid B | Plasmid C | Sym plasmid |
| Genes per replicon                 | 4710                                                                                                | 956       | 565       | 525       | 433/223     |
| >5-fold up bean only               | 183                                                                                                 | 14        | 17        | 22        | 117         |
| >5-fold up both                    | 56                                                                                                  | 3         | 25        | 5         | -           |
| >5-fold up pea only                | 200                                                                                                 | 12        | 13        | 5         | 33          |
| >5-fold down bean only             | 44                                                                                                  | 40        | 9         | 33        | 12          |
| >5-fold down both                  | 9                                                                                                   | 7         | 0         | 1         | -           |
| >5-fold down pea only              | 18                                                                                                  | 3         | 8         | 15        | 75          |
| <b>% age of genes per replicon</b> |                                                                                                     |           |           |           |             |
| >5-fold up bean only               | 5%                                                                                                  | 2%        | 7%        | 5%        | 27%         |
| >5-fold up pea only                | 5%                                                                                                  | 2%        | 7%        | 2%        | 15%         |
| >5-fold down bean only             | 1%                                                                                                  | 5%        | 2%        | 6%        | 3%          |
| >5-fold down pea only              | 1%                                                                                                  | 1%        | 2%        | 3%        | 34%         |
